# Supplementary material for: Serum Exosome MicroRNA as a Minimally-Invasive Early Biomarker of AML
Source: PubMed Central journal article supplement (PMC4650871; doi:10.1038/srep11295), 2015-06-12
Supplement: srep11295-s1.pdf [file srep11295-s1.pdf]

**Supplementary Material for**

**Serum Exosome MicroRNA as a Minimally-Invasive Early Biomarker of AML**

Noah I. Hornick, Jianya Huan, Ben Doron, Natalya A. Goloviznina, Jodi Lapidus, Bill H. Chang, Peter Kurre

Fig. S1

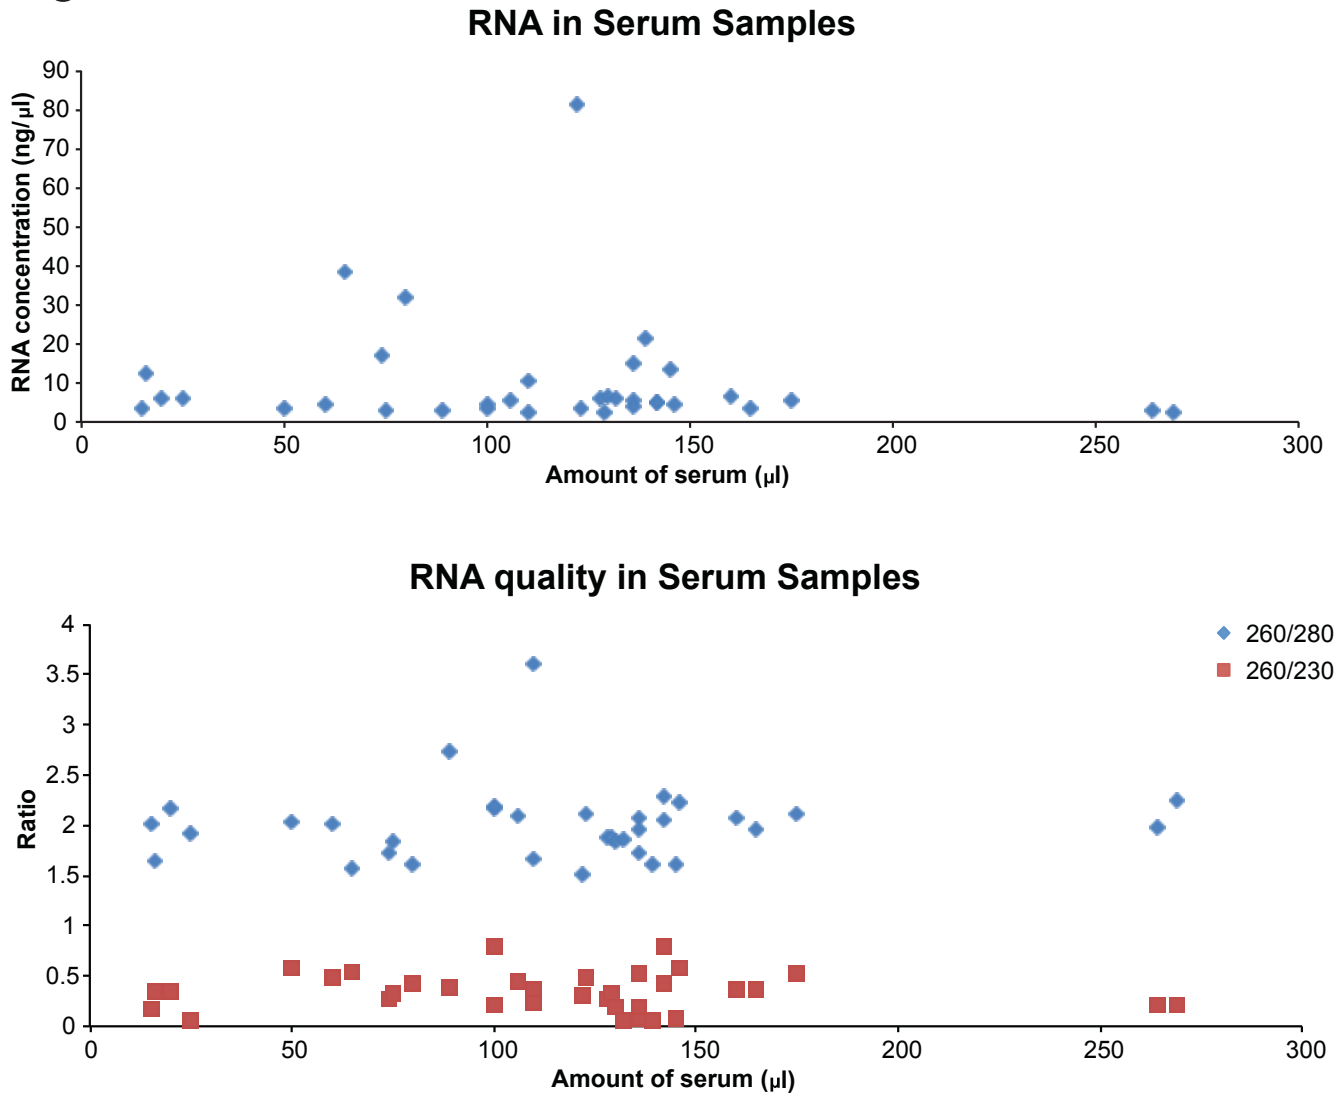

**Supplementary Figure S1. Serum exosome RNA yield and quality are independent of serum volume.**

Serum was collected from Molm-engrafted or control NSG mice, and exosomes were collected by ExoQuick precipitation. Total RNA was isolated, and concentration, 260/280, and 260/230 values were measured by spectrophotometer.

Fig. S2

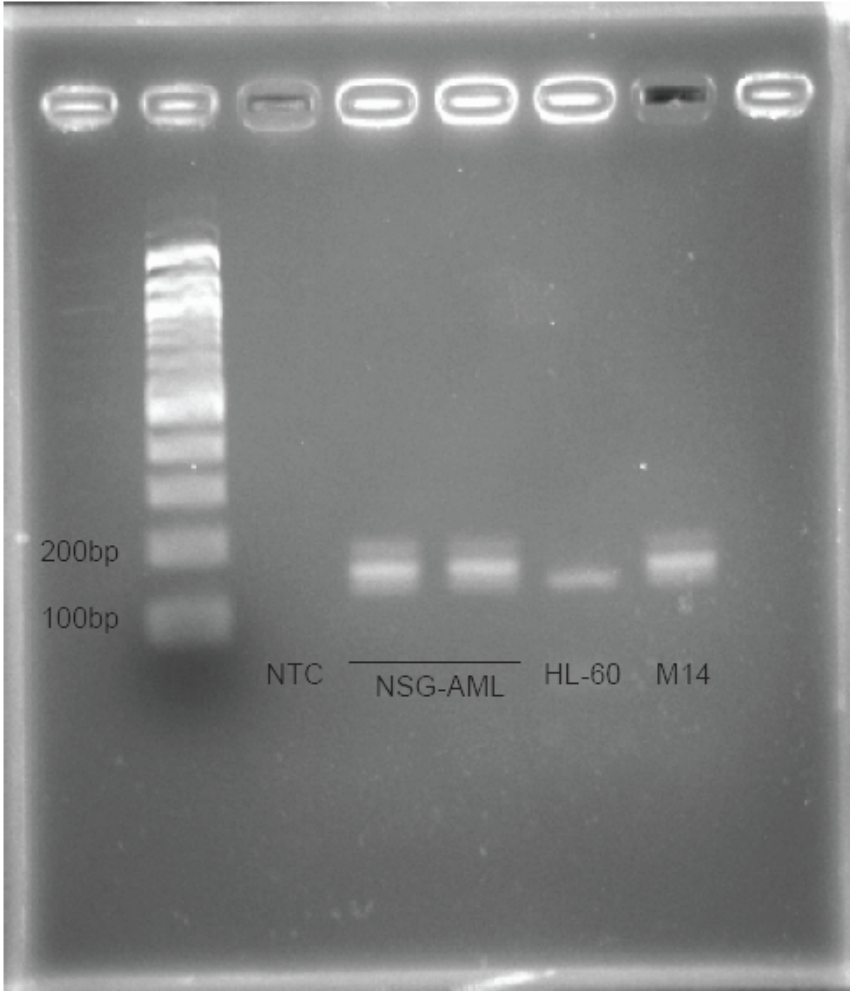

**Supplementary Figure S2. PCR for FLT3 in leukemia isolated from NSG xenografts**  
Molm-14 from engrafted NSG mice retained their characteristic FLT3-ITD mutation, detected by 40 cycles of PCR. NTC: null-template control; NSG-AML: isolated Molm-14; HL-60: cell line exhibiting WT FLT3; M14: Molm-14 stock culture.

Fig. S3

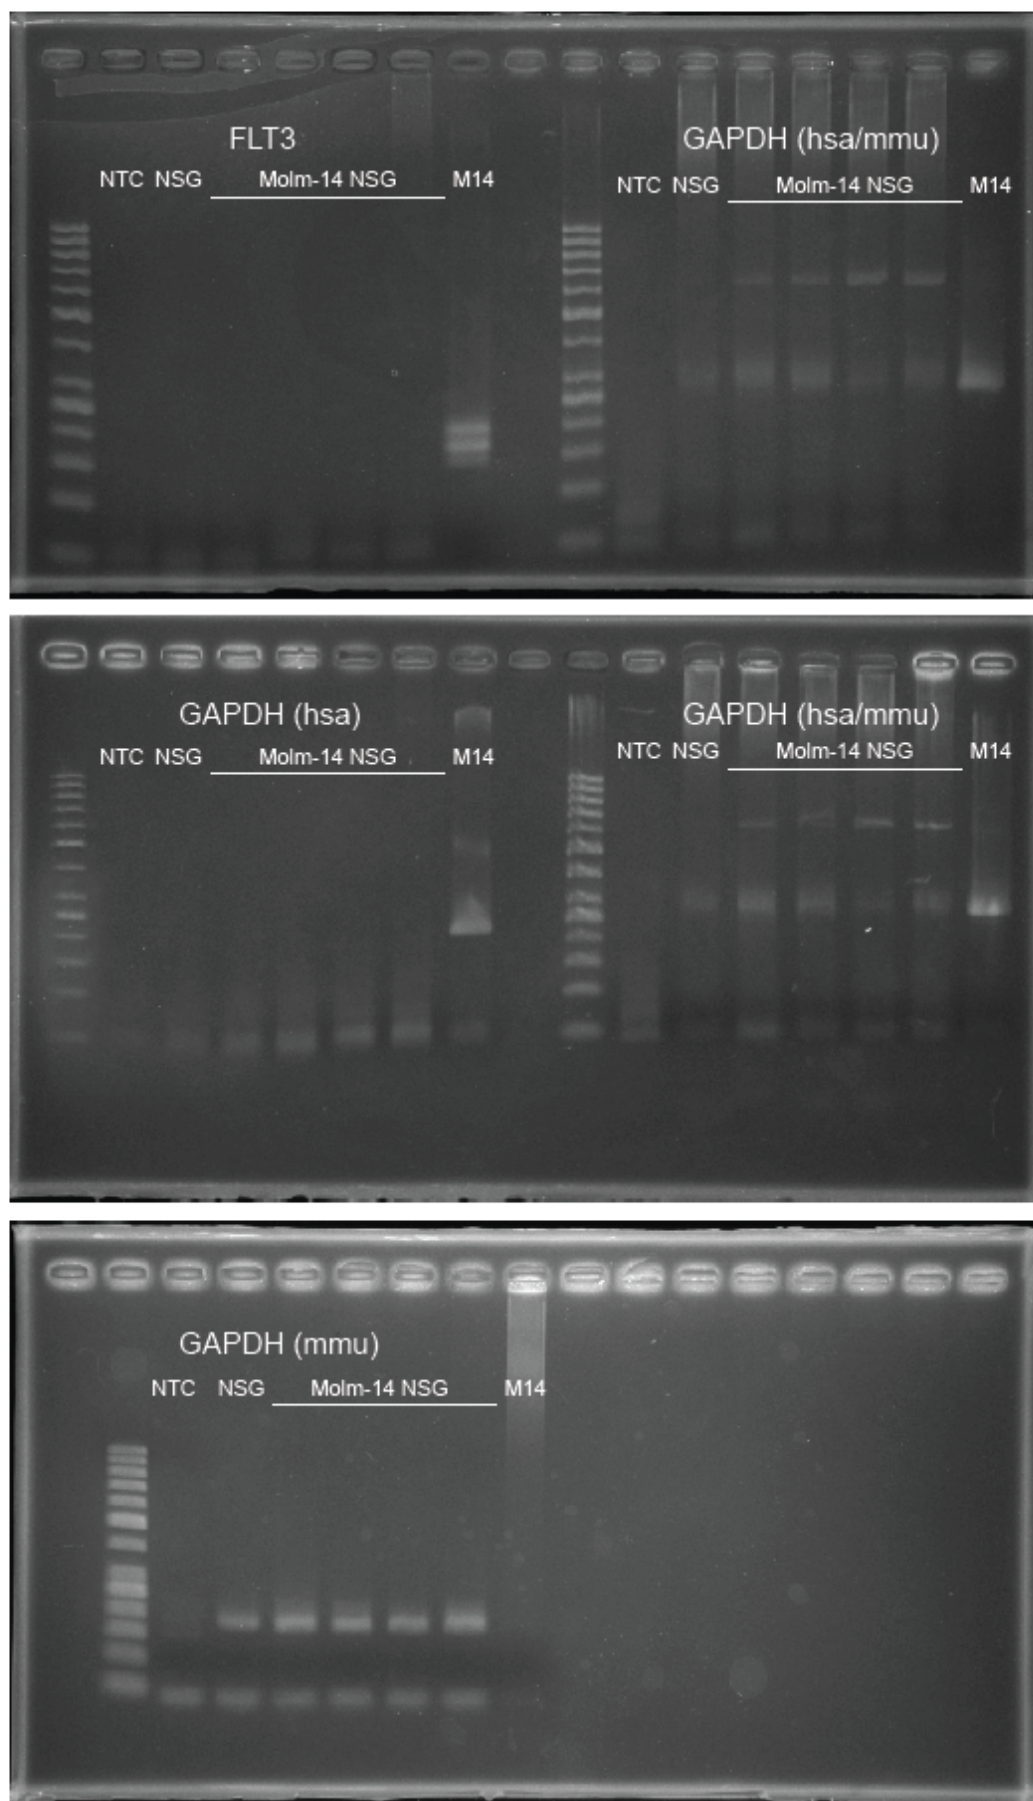

### Supplementary Figure S3. PCR for FLT3, GAPDH in serum exosomes isolated from NSG xenografts

Exosomes isolated from the peripheral blood of Molm-14-engrafted NSG mice were tested for human FLT3 and GAPDH and murine GAPDH using 45 cycles of PCR. NTC: null-template control. M14: Molm-14 stock culture. PB: Peripheral blood chimerism; BM: Bone marrow chimerism by flow cytometry for human CD45.

## Table S4

| Model          | Day 14      |         |        | Day 21      |         |        |
|----------------|-------------|---------|--------|-------------|---------|--------|
|                | n (control) | n (AML) | AUC    | n (control) | n (AML) | AUC    |
| 1246           | 20          | 18      | 0.6722 | 20          | 18      | 0.9583 |
| 150            | 35          | 40      | 0.4600 | 35          | 31      | 0.5217 |
| 155            | 34          | 40      | 0.6912 | 34          | 31      | 0.8065 |
| 1246, 150      | 20          | 18      | 0.8083 | 20          | 18      | 0.9667 |
| 1246, 155      | 20          | 18      | 0.7944 | 20          | 18      | 0.9528 |
| 150, 155       | 34          | 40      | 0.7463 | 34          | 31      | 0.8643 |
| 1246, 150, 155 | 20          | 18      | 0.8028 | 20          | 18      | 0.9944 |

### Supplementary Table S4. Comparison of miRNA marker combinations

Logistic regression was used to create weighted linear combinations of serum exosome miRNA markers, which were evaluated for their capacity to discriminate between xenografted mice (*n* in column n (AML)) and unengrafted controls (*n* in column n (control)) at 14 and 21 days post-engraftment. Areas under receiver operating characteristic (ROC) curves are presented as AUC.
